# Supplementary material for: Vaccination with Recombinant Cryptococcus Proteins in Glucan Particles Protects Mice against Cryptococcosis in a Manner Dependent upon Mouse Strain and Cryptococcal Species
Source: PubMed Central journal article supplement (PMC5705919; doi:10.1128/mbio.01872-17), 2017-11-28
Supplement: mbo006173613sf2.pdf [file mbo006173613sf2.pdf]

Supplementary Figure S2.

BALB/c mice

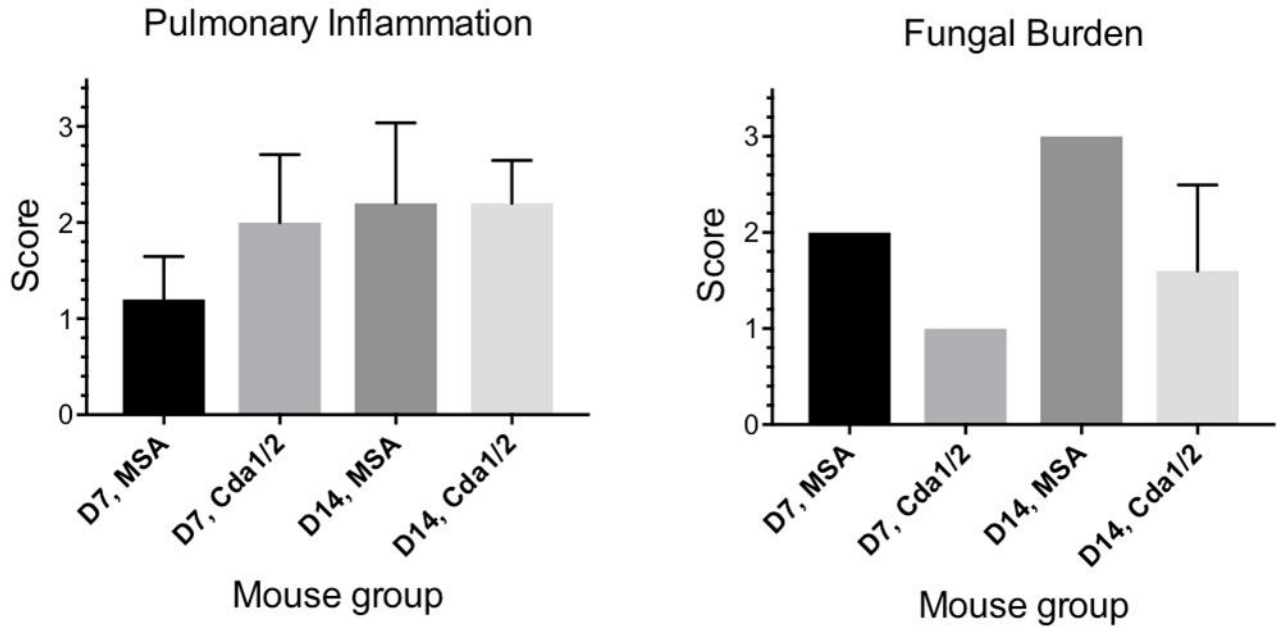

| <b>Pulmonary Inflammation</b>                         | <b>Score</b> |
|-------------------------------------------------------|--------------|
| No inflammation present                               | 0            |
| < 33% of lung inflamed                                | 1            |
| 33% - 66% of lung inflamed                            | 2            |
| 66% -100% of lung inflamed                            | 3            |
|                                                       |              |
| <b>Fungal Burden</b>                                  | <b>Score</b> |
| No organisms seen                                     | 0            |
| <33% of alveoli or airways contain organisms          | 1            |
| 33% - 66% of alveoli or airways contain organisms     | 2            |
| 66 - 100% of the alveoli or airways contain organisms | 3            |

**Pulmonary inflammation and fungal burden seen on pathology.** BALB/c mice were vaccinated three times with a 10 µg/dose each of GP-Cda1 and GP-Cda2 (Cda1/2) and then challenged with 10<sup>4</sup> CFU of *C. neoformans* strain KN99. Control mice received GP-MSA (MSA). At 7 and 14 days post-challenge, mice were euthanized, and stained slides prepared from sectioned lungs were scored by a pathologist blinded as to group. n= 5 mice/group. For fungal burdens, p<0.05 and p<0.001 comparing MSA with Cda1/2 at D7 and D14, respectively.
